# Supplementary material for: Data-Driven Approaches Used for Compound Library Design for the Treatment of Parkinson’s Disease
Source: MDPI journal article supplement (doi:10.3390/ijms24021134), 2023-01-06
Supplement: s1 [file s1]

**Supplementary material Table S2. Complete data from the PBPK modelling corresponding to 21 NP compound.** PK-Analyses of 21NP at 10 mg/Kg concentration obtained by PK-Sim software ver. 11. Important pharmacokinetics terms that describe and quantify aspects of the plasma concentration-time profile of an administered drug that includes Cmax, Vd and AUC.

*21NP Molecule*

| <i>Compartment</i>                                      | <i>Parameter</i>           |                                   |                                |
|---------------------------------------------------------|----------------------------|-----------------------------------|--------------------------------|
|                                                         | Concentration max (μmol/L) | Area under the curve (μmol*min/L) | Volume of distribution (ml/kg) |
| <i>Peripheral Venous Blood<br/>Plasma Concentration</i> | 50.98496628                | 4902.458496                       | 13070.41931                    |
| <i>Brain Tissue</i>                                     | 9.761239052                | 10919.19434                       | -                              |
| <i>Brain Intracellular</i>                              | 9.797018051                | 10950.96875                       | -                              |

**Supplementary material Table S3. Complete data from the PBPK modelling corresponding to 21 NP compound.** PK-Analyses of 21NP at 100 mg/Kg concentration obtained by PK-Sim software ver. 11. Important pharmacokinetics terms that describe and quantify aspects of the plasma concentration-time profile of an administered drug that includes Cmax, Vd and AUC.

*21NP Molecule*

| <i>Compartment</i>             | <i>Parameter</i>           |                                   |                                |
|--------------------------------|----------------------------|-----------------------------------|--------------------------------|
|                                | Concentration max (μmol/L) | Area under the curve (μmol*min/L) | Volume of distribution (ml/kg) |
| <i>Peripheral Venous Blood</i> |                            |                                   |                                |
| <i>Plasma Concentration</i>    | 509.849823                 | 49024.64844                       | 13071.24043                    |
| <i>Brain Tissue</i>            | 97.61241913                | 109191.9297                       | -                              |
| <i>Brain Intracellular</i>     | 97.97020721                | 109509.6719                       | -                              |

**Supplementary material Table S4. Complete data from the PBPK modelling corresponding to 6PP compound.** PK-Analyses of 6PP molecule at 10 mg/Kg concentration obtained by PK-Sim software ver. 11. Important pharmacokinetics terms that describe and quantify aspects of the plasma concentration-time profile of an administered drug that includes Cmax, Vd and AUC.

*6PP Molecule*

| <i>Compartment</i>                                      | <i>Parameter</i>           |                                   |                                |
|---------------------------------------------------------|----------------------------|-----------------------------------|--------------------------------|
|                                                         | Concentration max (μmol/L) | Area under the curve (μmol*min/L) | Volume of distribution (ml/kg) |
| <i>Peripheral Venous Blood<br/>Plasma Concentration</i> | 56.51828384                | 4696.896973                       | 12652.68898                    |
| <i>Brain Tissue</i>                                     | 5.816468239                | 6366.901367                       | -                              |
| <i>Brain Intracellular</i>                              | 5.837036133                | 6382.829102                       | -                              |

**Supplementary material Table S5. Complete data from the PBPK modelling corresponding to 6PP compound.** PK-Analyses of 6PP at 100 mg/Kg concentration obtained by PK-Sim software ver. 11. Important pharmacokinetics terms that describe and quantify aspects of the plasma concentration-time profile of an administered drug that includes Cmax, Vd and AUC.

*6PP Molecule*

| <i>Compartment</i>             | <i>Parameter</i>           |                                   |                                |
|--------------------------------|----------------------------|-----------------------------------|--------------------------------|
|                                | Concentration max (μmol/L) | Area under the curve (μmol*min/L) | Volume of distribution (ml/kg) |
| <i>Peripheral Venous Blood</i> | 46968.96875                | 565.1828613                       | 12652.78149                    |
| <i>Plasma Concentration</i>    |                            |                                   |                                |
| <i>Brain Tissue</i>            | 63669.01563                | 58.16467667                       | -                              |
| <i>Brain Intracellular</i>     | 63828.29297                | 58.37035751                       | -                              |
