# Supplementary material for: Data-Driven Approaches Used for Compound Library Design for the Treatment of Parkinson’s Disease
Source: Int J Mol Sci. 2023 Jan 6;24(2):1134. doi: 10.3390/ijms24021134 (PMC9867512; doi:10.3390/ijms24021134)
Supplement: Supplementary file 1 [file ijms-24-01134-s001.zip › Table S1.xlsx]

## Sheet: Hoja1
Author	Compounds	References
Kou et al., 2015	Ampelopsin	http://dx.doi.org/10.1016/j.jff.2015.10.010
Araujo et al., 2015	gamma-oryzanol	http://dx.doi.org/10.1016/j.neuro.2015.09.003
Wang et al., 2015	Biochanin A	http://dx.doi.org/10.1016/j.pbb.2015.09.013
Zhang et al., 2015	protocatechuic acid	http://dx.doi.org/10.1016/j.freeradbiomed.2015.02.030
Dashti et al., 2015	Kororamide B, kororamide A, convolutamine I, Convolutamine J	http://dx.doi.org/10.1016/j.tet.2015.08.017
Kadhira et al., 2017	sesamol	http://dx.doi.org/10.22159/ajpcr.2017.v10i4.12961
Yang et al 2017	4,7b,17b,29-Tetrahydroxy-16-oxo-3,4-seco-28-nor-olean-12-en-3-oic acid, 4,7b,17b,29-Tetrahydroxy-16-oxo-3,4-seco-28-nor-olean-12-en-3-oic acid methyl ester, 4,7b,17b-Trihydroxy-16-oxo-3,4-seco-28-nor-olean-12-en-3-oic acid n-butyl ester, 17b,29-Dihydroxy-16-oxo-3,4-seco-28-nor-olean-4(23),12-dien-3-oic acid	http://dx.doi.org/10.1016/j.tet.2016.04.045
Meenakshi et al., 2016	fucoidan	http://dx.doi.org/10.1016/j.ijbiomac.2015.12.025
Olatunjia et al., 2016	Cordycepin	http://dx.doi.org/10.1016/j.biopha.2016.03.009
Akhoon et al., 2016	Withanolide A	http://dx.doi.org/10.1016/j.exger.2016.03.004
Nuria de Pedro et al., 2016	isolecanoric acid	http://dx.doi.org/10.1016/j.neuropharm.2015.09.029
Siddique et al., 2016	Geraniol	http://dx.doi.org/10.1016/j.etap.2016.03.018
Khatri, et al., 2016	Curcumin	http://dx.doi.org/10.1016/j.pbb.2016.09.002
Kim et al., 2016	Naringin	10.1016/j.jnutbio.2015.10.013.
Lee et al., 2016	genistein, HMMDP, formononetin, maackiain, sophoraflavanone B, kushenol F, kushenol E	http://dx.doi.org/10.1016/j.bmcl.2016.08.044
Zarmouh et al., 2016	genistein, daidzein	http://dx.doi.org/10.1155/2016/1423052
Wang et al., 2016	jaspterin, splendamide, jaspnin A, 6-bromo-1H-indole-3-carboximidamide, guanosine, 6-deoxyguanosine, thymidine, toyocamycin, 5-(methoxycarbonyl) tubercidin, sangivamycin, 5-(methoxycarbonyl) tubercidin aglycone, toyocamycin aglycone, 6-bromotryptamine, 6-bromo-1H-indole-3-carboxamide, 6-bromo-1H-indole-3-carboxylic acid methyl ester, jaspamide, jasplakinolide B, jaspamide Z1, jasplakinolide F, pi…	10.1021/acs.jnatprod.5b00987
Porres-Martínez et al., 2016	a-pinene, 1,8-cineole	10.1515/znc-2014-4135
Li etal. 2016	oxyphylla A	10.1021/acs.jproteome.6b00152
Mazzio et al., 2016	Cardamonin, Apicidin, Dexamethasone, Hydrocortisone, Apigenin, Butein, Quercetin, Biochanin A, Bergamottin, Epigallocatechin gallate, Curcumin	10.1186/s12906-016-1429-x
Fu et al., 2017	trans-Cinnamaldehyde	doi.org/10.1155/2017/4730878
Leonoudakis et al., 2017	Securinine	https://doi.org/10.1155/2017/8302636
Zarmouh et al., 2017	Biochanin A,isopsoralen, 6-prenylnaringenin, neobavaisoflavone, psoralen, psoralidin	10.1186/s12906-016-1525-y
Perni et al., 2017	squalamine	10.1073/pnas.1610586114
Chen et al., 2017	Schisantherin A	10.1021/acsami.7b01171
Wang et al., 2017	cannabivarin, cannabinol, 10a-hydroxy-hexahydrocannabinol, cannabichromevarin, cannabichromene, cannabichromanone, (Z)-methyl p-hydroxycinnamate, (E)-methyl p-hydroxycinnamate, 3-hydroxy- 4-methylacetophenone, coniferaldehyde, p-hydroxyenzaldehyde, 4-hydroxy- 3-methoxyacetophenone, vanillin, 3-hydroxy-6- methylacetophenone, senkyunolide, 3b-hidroxyolean-12-en-11-one, 9,10-dihydro- 2,3,5,6-tetrame…	dx.doi.org/10.1016/j.bioorg.2017.03.011
Shi et al., 2017	mangiferin	SSN:1940-5901/IJCEM0046579
Ara et al., 2017	Myricetin	10.4103/ijnpnd.ijnpnd_41_17
Xu et al., 2017	Loganin	10.1002/jcb.26010
Gonzalez-Burgos et al., 2017	Ginsenoside Re, Ginsenoside Rb2, Ginsenoside Rg1	http://dx.doi.org/10.1016/j.fct.2017.08.013
Anusha et al., 2017	apigenin	http://dx.doi.org/10.1016/j.cbi.2017.03.016
Masaki et al., 2017	2',3'-dihydroxy-4',6'-dimethoxychalcone (DDC)	http://dx.doi.org/10.1016/j.ejphar.2017.02.005
Chen et al., 2017	icariin	http://dx.doi.org/10.1016/j.phymed.2016.12.017
Wang et al., 2017	(7R, 8S)-7-(4-hydroxy-3,5-dimethoxyphenyl)-8-hydroxymethyl-10-[N-700-(400-hydrxyphenyl)ethyl]carbamoylethenyl-30-methoxybenzodihydrofuran, cannabisin D, grossamide K, trans-N-phydroxycinnamoyl-7'-methoxyltyramine, erythro-canabisine H, cannabisin E, trans-N-feruloyloctopamine, trans-N-feruloyl-7'-methoxyltyramine, cis-N-phydroxycinnamoyl-7'-methoxyethyltyramine, trans-N-phydroxycinnamoyltyramine,…	http://dx.doi.org/10.1016/j.jff.2017.01.045
Kim et al., 2017	Acacetin	https://doi.org/10.1016/j.bmcl.2017.10.048
Qu et al., 2018	Rosmarinic acid	https://doi.org/10.1016/j.neuropharm.2018.09.042
Wang et al., 2018	B-Caryophyllene	https://doi.org/10.1016/j.biopha.2018.03.168
Shivanandappa, 2018	4-Hydroxyisophthalic acid	https://doi.org/10.1016/j.neuro.2018.04.006
Li et al., 2018	acteoside	https://doi.org/10.1016/j.fct.2018.06.018
Goes et al.,2018	chrysin	https://doi.org/10.1016/j.cbi.2017.10.019
Maiolo et al., 2018	Curcumin, piceatannol glucoside, cinnamaldehyde, Caffeoyltyramine	https://doi.org/10.1016/j.jtcme.2017.11.001
Kulikova et al., 2018	a-lipoic acid, carnosine, carnosine/a-lipoic acid	https://doi.org/10.1016/j.yrtph.2018.03.025
Cobourne-Duval et al., 2018	Thymoquinone	doi.org/10.1016/j.jneuroim.2018.04.018
Wang et al., 2018	Resveratrol	10.1021/acssuschemeng.8b04507
Siddique et al., 2019	genistein	oi.org/10.1080/19390211.2018.1472706
Engelbrecht et al., 2019	Morin, Taxifolin, Chlorogenic acid, Catechin, Rutin, Fisetin, Chrysin, Nerolidol, Cedrol, Thymoquinone, 5-Methoxypsoralen, Jasmone, Chrysophanic acid, 8-Methoxypsoralen, Sesamol, Alizarin, Chrysophanol, b-Pinene, Rhein	10.2174/1871524919666190619090852
Derf et al., 2019	Aegeline, Radicicol	https://doi.org/10.1016/j.bmcl.2018.12.028
Cheng et al., 2019	Curcumin	10.1021/acsami.9b02797
Wu et al., 2019	Salvianolic acid B, Dihydromyricetin	doi.org/10.1186/s40035-019-0159-7
Cai et al., 2019	harmine	https://doi.org/10.1016/j.phymed.2019.152842
Vijayakumaran et al., 2019	Ginkgolic acid	doi.org/10.1016/j.mcn.2019.103416
Kwon et al., 2019	Hyperoside, astersaponin I	10.3390/ijms20235832
de Oliveira et al., 2019	naringenin	https://doi.org/10.1016/j.cbi.2019.108728
Liu et al., 2019	mahanimbine, mahanine, murrayamine B, murrastinine A, pyrayafoline D, clauselansiumines A, clauselansiumines B, O-methylpyrayafoline D, murrayamine C, murrayamine J, murrayamine N, murrayakonine C, Oridonin	https://doi.org/10.1016/j.bioorg.2019.103278
Pandey et al., 2019	tambulin	https://doi.org/10.1016/j.exger.2019.02.016
Save et al., 2019	Safranal	https://doi.org/10.1016/j.ijbiomac.2019.09.053
Zhang et al., 2019	Caffeic acid	https://doi.org/10.1016/j.phrs.2019.104538
Sánchez-Giraldo et al., 2019	Epigallocatechin-3-gallate	https://doi.org/10.1016/j.jddst.2019.101466
Krishnamoorthy et al., 2019	Chrysin	https://doi.org/10.1016/j.neulet.2019.134382
Li et al., 2019	farrerol	https://doi.org/10.1016/j.intimp.2019.105739
Parkhe et al., 2019	alpha mangostin	https://doi.org/10.1016/j.neulet.2019.134652
Fatima et al., 2019	tangeritin	https://doi.org/10.1016/j.neulet.2019.04.047
Liu et al., 2019	Resveratrol	https://doi.org/10.1016/j.bbr.2019.03.043
Xue et al., 2019	chitosan	https://doi.org/10.1016/j.jmst.2019.10.013
Zhao et al., 2020	Rosmarinic acid	https://doi.org/10.1016/j.tiv.2020.104823
Rao et al., 2020	Embelin	https://doi.org/10.1016/j.bbabio.2020.148157
Sharma et al., 2020	rutin	https://doi.org/10.1016/j.chemphyslip.2020.104890
Leri et al., 2020	Maysin	https://doi.org/10.1016/j.fct.2020.111626
Giuliano et al., 2020	7-hydroxymatairesinol	https://doi.org/10.1016/j.nut.2019.04.006
Liu et al., 2020	Ginkgolide B	https://doi.org/10.1016/j.ijpharm.2020.119053
Peshattiwar et al.,2020	Ursolic acid	https://doi.org/10.1016/j.brainresbull.2020.03.003
Nguyen et al., 2020	bocconoline, 6-(1-hydroxyethyl)-5,6- dihydrochelerythrine	https://doi.org/10.1016/j.bmc.2020.115732
Kumar, Prashanth 2020	chitosan	https://doi.org/10.1016/j.fct.2020.111860
Siima et al., 2020	6-hydroxy-2,3,4,4' -tetramethoxychalcone, 6-methoxyhamiltone A, diosquinone, toussantine D	https://doi.org/10.1016/j.neuro.2020.09.004
Kaji et al., 2020	Sesaminol	https://doi.org/10.1016/j.heliyon.2020.e05342
Sun et al.,2020	Cordycepin	https://doi.org/10.1016/j.jff.2020.104274
Sekowski et al., 2020	1,3,6-tri-O-galloyl-B-D-glucose, 1-O-galloyl-2,3-hexahydroxydiphenoyl-4,6-valoneoyl-B-D-glucose	https://doi.org/10.1016/j.molliq.2019.112112
Xiong et al., 2020	Resveratrol	https://doi.org/10.1016/j.ajps.2019.04.003
Zhang et al., 2020	acidic heteropolysaccharide	https://doi.org/10.1016/j.carbpol.2020.116894
Dong et al., 2020	Polymannuronic acid	https://doi.org/10.1016/j.ijbiomac.2020.07.180
Zhu et al., 2020	Naringin	doi.org/10.1155/2020/6069354
Tan et al., 2020	Harpagide	10.1039/c9sc05538j
Yurchenko et al., 2020	niveoglaucins A, isodihydroauroglaucin, Flavoglaucin, aspergin	10.1080/14786419.2018.1547293
Han et al., 2020	Patulin	10.3390/toxins12110681
